# Supplementary material
Source: PubMed Central journal article supplement (PMC9772065)

## **SUPPLEMENTAL DIGITAL CONTENT**

### **A. TEXT S1. INSTITUTIONAL REVIEW BOARD (IRB) APPROVALS**

The IRB approvals for each participating center are listed below:

1. University of Pennsylvania: Protocol # 826458
2. Johns Hopkins University: Protocol # IRB001050712
3. University of Maryland: Protocol # HP-00072951

### **B. TEXT S2**

**B.1. Clinical data collection.** Data on solid organ transplant (SOT) recipients were abstracted from the electronic medical records at each study site by a combination of electronic data extraction, with validation of variables, and manual chart review.

Information was collected on the following: demographics (eg, age, gender), comorbidities (eg, diabetes, asthma), medications (including current and prior immunosuppressants and antibiotics), viral serologies (eg, cytomegalovirus [CMV]), transplanted organ, date of transplant, induction immunosuppression, primary graft dysfunction, need for re-operation posttransplant, donor type, prior rejection episodes within 3 months prior to the Enterobacterales (EB) bloodstream infection (BSI), microbiology results for the 1 year prior to the EB BSI, and details of the EB BSI episode (including dates of positive blood cultures, organism(s) that grew on culture, in vitro susceptibilities, and a determination of the source of the EB BSI by each site-PI using standardized criteria). Inpatient and outpatient antibiotic therapy in the 6 months preceding the BSI was documented and categorized as described below.

**B.2. Antimicrobial classification.** For the purposes of the analysis, antibiotics were categorized as follows: aminoglycosides; amoxicillin and ampicillin; amoxicillin-clavulanate or ampicillin-sulbactam; aztreonam; first-generation cephalosporins; second-generation cephalosporins; third-generation cephalosporins; fourth-generation cephalosporins; ceftaroline; carbapenems; clindamycin; daptomycin; fosfomycin; fluoroquinolones; macrolides; metronidazole; anti-staphylococcal penicillins; polymyxins (colistin and polymyxin B); nitrofurantoin; penicillin; piperacillin-tazobactam; tetracyclines; linezolid; rifampin; trimethoprim-sulfamethoxazole; intravenous vancomycin; oral vancomycin; rifaximin; dapson; and atovaquone. Antifungals were categorized as fluconazole; voriconazole and posaconazole; echinocandins; amphotericin.

**B.3. Effective antibiotic therapy classification.** Subjects were considered to have been given “effective antibiotic therapy” if they were administered at least one dose an antibiotic to which the EB organism was susceptible in vitro with the following guidelines and exceptions:

| EB susceptibility category                          | Effective antibiotics (if susceptible in vitro) <sup>a</sup>                                                                                                                                                                                                                            | Not effective antibiotics (regardless of in vitro susceptibility)                                                                                                                                                                                                |
|-----------------------------------------------------|-----------------------------------------------------------------------------------------------------------------------------------------------------------------------------------------------------------------------------------------------------------------------------------------|------------------------------------------------------------------------------------------------------------------------------------------------------------------------------------------------------------------------------------------------------------------|
| <b>Carbapenem-resistant Enterobacteriales (CRE)</b> | <ul style="list-style-type: none"> <li>• Meropenem, imipenem-cilastatin, doripenem <i>if EB only resistant to ertapenem</i></li> <li>• Fluoroquinolones</li> <li>• Polymyxins</li> <li>• Tigecycline</li> <li>• Aminoglycosides</li> <li>• Ceftazidime-avibactam<sup>b</sup></li> </ul> | <ul style="list-style-type: none"> <li>• Amoxicillin or ampicillin</li> <li>• Amoxicillin-clavulanate or Ampicillin-sulbactam</li> <li>• First-, third-, and fourth-generation cephalosporins</li> <li>• Piperacillin-tazobactam</li> <li>• Ertapenem</li> </ul> |

|                                                             |                                                                                                                                                                                                                                                                                                                                                                  |                                                                                                                                                                                                                                                                    |
|-------------------------------------------------------------|------------------------------------------------------------------------------------------------------------------------------------------------------------------------------------------------------------------------------------------------------------------------------------------------------------------------------------------------------------------|--------------------------------------------------------------------------------------------------------------------------------------------------------------------------------------------------------------------------------------------------------------------|
|                                                             | <ul style="list-style-type: none"> <li>• Ceftolozane-tazobactam<sup>b</sup></li> <li>• Meropenem-vaborbactam<sup>b</sup></li> </ul>                                                                                                                                                                                                                              |                                                                                                                                                                                                                                                                    |
| <b>Extended-spectrum beta-lactamase (ESBL)-producing EB</b> | <ul style="list-style-type: none"> <li>• Carbapenems</li> <li>• Fluoroquinolones</li> <li>• Aminoglycosides</li> <li>• Polymyxins</li> <li>• Tigecycline</li> <li>• Ceftazidime-avibactam<sup>b</sup></li> <li>• Ceftolozane-tazobactam<sup>b</sup></li> <li>• Meropenem-vaborbactam<sup>b</sup></li> </ul>                                                      | <ul style="list-style-type: none"> <li>• Amoxicillin or ampicillin</li> <li>• Amoxicillin-clavulanate or Ampicillin-sulbactam</li> <li>• Third-generation cephalosporins</li> <li>• Fourth-generation cephalosporins</li> <li>• Piperacillin-tazobactam</li> </ul> |
| <b>Susceptible EB (ie, not ESBL-producing or CRE)</b>       | <ul style="list-style-type: none"> <li>• Amoxicillin or ampicillin</li> <li>• Amoxicillin-clavulanate or Ampicillin-sulbactam</li> <li>• First-, third-, and fourth-generation cephalosporins</li> <li>• Aztreonam</li> <li>• Fluoroquinolones</li> <li>• Piperacillin-tazobactam</li> <li>• Polymyxins</li> <li>• Carbapenems</li> <li>• Tigecycline</li> </ul> | N/A                                                                                                                                                                                                                                                                |

**Time to effective antibiotic therapy** was defined as the number of days between the first positive blood culture and the first dose of an effective antibiotic, where day 0 was defined as the day that the first positive blood culture was collected. Antibiotics were evaluated through 90 days post-EB BSI onset.

<sup>a</sup>Antibiotics in this category were only considered “effective” if the EB organism exhibited in vitro susceptibility to the antibiotic administered.

<sup>b</sup>Ceftazidime-avibactam, ceftolozane-tazobactam, and meropenem-vaborbactam were the only antibiotics containing novel beta-lactamase inhibitors available at the time that this data was collected.

BSI, bloodstream infection; EB, Enterobacterales.

### C. SUPPLEMENTAL TABLES

**Table S1.** Multivariable survival analysis among liver transplant recipients evaluating the association between CRE BSI, (A) all-cause mortality, and (B) new-onset graft failure.

| <b>A. All-cause mortality</b>                                     |             |                  |              |
|-------------------------------------------------------------------|-------------|------------------|--------------|
| <b>Characteristic</b>                                             | <b>aHR</b>  | <b>95% CI</b>    | <b>P</b>     |
| <b>CRE BSI (compared to non-CRE EB BSI)</b>                       | <b>1.60</b> | <b>0.83-3.05</b> | <b>0.158</b> |
|                                                                   |             |                  |              |
| Prior CRE colonization/infection <sup>a</sup>                     | 1.77        | 0.84-3.69        | 0.131        |
| Hepatitis C infection as the indication for Liver transplantation | 2.33        | 1.39-3.92        | 0.001        |
| Living organ donor                                                | 0.32        | 0.12-0.90        | 0.031        |
| Primary graft dysfunction after transplant                        | 1.92        | 1.03-3.56        | 0.039        |
| <b>B. New-onset graft failure</b>                                 |             |                  |              |
| <b>Characteristic</b>                                             | <b>aSHR</b> | <b>95% CI</b>    | <b>P</b>     |
| <b>CRE BSI (compared to non-CRE EB BSI)</b>                       | <b>0.70</b> | <b>0.25-1.99</b> | <b>0.506</b> |
|                                                                   |             |                  |              |
| Hepatitis C infection as the indication for Liver transplantation | 1.87        | 1.00-3.49        | 0.050        |
| Prior exposure to metronidazole <sup>b</sup>                      | 2.61        | 1.34-5.09        | 0.005        |
| Prior exposure to rituximab <sup>c</sup>                          | 2.97        | 0.95-9.35        | 0.062        |

|            |            |           |       |
|------------|------------|-----------|-------|
| Study site |            |           |       |
| Site 1     | <i>ref</i> |           |       |
| Site 2     | 0.90       | 0.40-2.06 | 0.809 |
| Site 3     | 0.46       | 0.20-1.05 | 0.065 |

<sup>a</sup>Organism isolated on any microbiological culture from any anatomical site in the 1 year prior to the EB BSI. (No surveillance cultures performed at the included study sites.)

<sup>b</sup>Exposure within the 6 months prior to the EB BSI.

<sup>c</sup>Exposure within the 12 months prior to the EB BSI.

aHR, adjusted hazard ratio; aSHR, adjusted subhazard ratio; BSI, bloodstream infection; CI, confidence interval; CRE, carbapenem-resistant Enterobacterales; EB, Enterobacterales; ref, reference.

**Table S2.** Mixed effects multivariable logistic regression of risk factors for CRE BSI among liver transplant recipients.

| <b>Baseline characteristic</b>                | <b>aOR</b> | <b>95% CI</b> | <b><i>P</i></b> |
|-----------------------------------------------|------------|---------------|-----------------|
| Prior exposure to a carbapenem <sup>a</sup>   | 3.74       | 1.70-8.22     | 0.001           |
| Prior CRE colonization/infection <sup>b</sup> | 4.99       | 1.85-13.49    | 0.002           |
| Living donor                                  | 0.18       | 0.05-0.72     | 0.016           |
| Time from transplant to EB BSI (per day)      | 0.99       | 0.998-0.999   | 0.019           |

<sup>a</sup>Exposure within the 6 months prior to the EB BSI.

<sup>b</sup>Organism isolated on any microbiological culture from any anatomical site in the 1 year prior to the EB BSI. (No surveillance cultures performed at the included study sites.)

aOR, adjusted odds ratio; BSI, bloodstream infection; CI, confidence interval; CRE, carbapenem-resistant Enterobacterales; EB, Enterobacterales.

**Table S3.** Mixed effects bivariate survival analysis of the association between CRE BSI, (A) all-cause mortality, and (B) new-onset graft failure stratified by organ transplant type.

| <b>A. All-cause mortality</b>                                                 |            |               |          |
|-------------------------------------------------------------------------------|------------|---------------|----------|
| <b>Characteristic</b>                                                         | <b>HR</b>  | <b>95% CI</b> | <b>P</b> |
| CRE BSI (compared to non-CRE EB BSI) in <i>kidney transplant recipients</i>   | 13.68      | 5.55-33.75    | <0.001   |
| CRE BSI (compared to non-CRE EB BSI) in <i>heart transplant recipients</i>    | 3.17       | 0.34-29.64    | 0.311    |
| CRE BSI (compared to non-CRE EB BSI) in <i>lung transplant recipients</i>     | 6.78       | 2.44-18.87    | <0.001   |
| CRE BSI (compared to non-CRE EB BSI) in <i>pancreas transplant recipients</i> | 15.85      | 1.53-163.70   | 0.020    |
| <b>B. New-onset graft failure<sup>a</sup></b>                                 |            |               |          |
| <b>Characteristic</b>                                                         | <b>SHR</b> | <b>95% CI</b> | <b>P</b> |
| CRE BSI (compared to non-CRE EB BSI) in <i>kidney transplant recipients</i>   | 5.42       | 1.51-19.45    | 0.009    |
| CRE BSI (compared to non-CRE EB BSI) in <i>heart transplant recipients</i>    | 7.30       | 1.21-44.11    | 0.030    |
| CRE BSI (compared to non-CRE EB BSI) in <i>lung transplant recipients</i>     | 12.65      | 2.36-67.79    | 0.003    |

<sup>a</sup>Pancreas transplant recipients omitted due to insufficient numbers for analysis.

BSI, bloodstream infection; CI, confidence interval; CRE, carbapenem-resistant Enterobacterales; EB, Enterobacterales; HR, hazard ratio; SHR, subhazard ratio.



**Table S4.** Management of EB BSIs, stratified by carbapenem-resistance.

| <b>Management<sup>a</sup></b>                    | <b>CRE BSI<br/>(N = 70)</b> | <b>Non-CRE EB BSI<br/>(N = 827)</b> | <b>P</b> |
|--------------------------------------------------|-----------------------------|-------------------------------------|----------|
| <b>Antibiotics<sup>b</sup></b>                   |                             |                                     |          |
| Days to effective therapy, median (IQR),<br>days | 3 (0-90)                    | 1 (0-2)                             | <0.001   |
| Effective antibiotics within 24 hours            | 27 (39%)                    | 597 (72%)                           | <0.001   |
| <b>First effective antibiotic received</b>       |                             |                                     |          |
| Aminoglycoside                                   | 17 (24%)                    | 31 (4%)                             | <0.001   |
| Aztreonam                                        | 0 (0%)                      | 8 (1%)                              | 0.409    |
| Carbapenem                                       | 10 (14%) <sup>c</sup>       | 200 (24%)                           | 0.060    |
| Fluoroquinolone                                  | 7 (10%)                     | 125 (15%)                           | 0.246    |
| Fourth-generation cephalosporin                  | 0 (0%)                      | 170 (21%)                           | <0.001   |
| Piperacillin-tazobactam                          | 0 (0%)                      | 194 (23%)                           | <0.001   |
| Polymixin                                        | 4 (6%)                      | 4 (0.5%)                            | <0.001   |
| Third-generation cephalosporin                   | 0 (0%)                      | 50 (6%)                             | 0.034    |
| Tigecycline                                      | 12 (17%)                    | 6 (1%)                              | <0.001   |
| <b>Source control</b>                            |                             |                                     |          |
| Abscess drainage <sup>d</sup>                    | 5 (7%)                      | 27 (3%)                             | 0.096    |
| Central venous catheter removed <sup>e</sup>     | 6 (9%)                      | 69 (8%)                             | 0.947    |

<sup>a</sup>Data are presented as numbers (percentages) except where noted.

<sup>b</sup>Effective antibiotics defined as per Text S2 part B3.

<sup>b</sup>There were 10 cases in which the Enterobacterales organism was nonsusceptible to ertapenem but susceptible to meropenem and was treated with meropenem.

<sup>c</sup>Only assessed in those in whom an intra-abdominal abscess was the source of the EB BSI.

<sup>d</sup>Only assessed in those in whom a central venous catheter was the source of the EB BSI.

BSI, bloodstream infection; CRE, carbapenem-resistant Enterobacterales; EB, Enterobacterales; IQR, interquartile range.

**Table S5.** Mixed effects survival analysis of the association between CRE BSI, (A) all-cause mortality, and (B) new-onset graft failure after adjusting for time to effective antibiotic therapy.

| <b>A. All-cause mortality</b>                                           |             |                  |                  |
|-------------------------------------------------------------------------|-------------|------------------|------------------|
| <b>Characteristic</b>                                                   | <b>aHR</b>  | <b>95% CI</b>    | <b>P</b>         |
| <b>CRE BSI (compared to non-CRE EB BSI)</b>                             | <b>2.60</b> | <b>1.54-4.41</b> | <b>&lt;0.001</b> |
| Prior CRE colonization/infection <sup>a</sup>                           | 0.91        | 0.46-1.80        | 0.795            |
| Age (per year)                                                          | 1.03        | 1.02-1.05        | <0.001           |
| Prior EB on respiratory culture <sup>a</sup>                            | 3.10        | 2.02-4.78        | <0.001           |
| Rejection prior to the EB BSI treated with corticosteroids <sup>b</sup> | 1.89        | 1.04-3.43        | 0.038            |
| Prior polymyxin exposure <sup>b</sup>                                   | 2.53        | 1.32-4.83        | 0.005            |
| Graft failure prior to the EB BSI                                       | 1.86        | 1.27-2.72        | 0.001            |
| <b>Days to effective antibiotic therapy</b>                             | <b>1.01</b> | <b>1.00-1.01</b> | <b>0.034</b>     |
| Organ transplant type                                                   |             |                  |                  |
| Kidney                                                                  | <i>ref</i>  |                  |                  |
| Liver                                                                   | 2.77        | 1.78-4.31        | <0.001           |
| Heart                                                                   | 1.26        | 0.56-2.86        | 0.575            |
| Lung                                                                    | 1.50        | 0.75-3.00        | 0.246            |
| Pancreas                                                                | 3.87        | 1.49-10.04       | 0.005            |
| <b>B. New-onset graft failure</b>                                       |             |                  |                  |

| Characteristic                                   | aSHR        | 95% CI           | P            |
|--------------------------------------------------|-------------|------------------|--------------|
| <b>CRE BSI (compared to non-CRE EB BSI)</b>      | 2.03        | 1.09-3.78        | 0.025        |
| Rejection prior to the EB BSI <sup>c</sup>       | 1.79        | 0.99-3.22        | 0.053        |
| Prior EB on genitourinary culture <sup>a</sup>   | 0.44        | 0.23-0.82        | 0.010        |
| Prior EB on respiratory culture <sup>a</sup>     | 2.65        | 1.42-4.94        | 0.002        |
| Prior exposure to metronidazole <sup>b</sup>     | 1.74        | 1.03-2.93        | 0.039        |
| Prior exposure to an aminoglycoside <sup>b</sup> | 1.01        | 0.50-2.05        | 0.978        |
| <b>Days to effective antibiotic therapy</b>      | <b>1.01</b> | <b>1.00-1.02</b> | <b>0.009</b> |
| Organ transplant type                            |             |                  |              |
| Kidney                                           | <i>ref</i>  |                  |              |
| Liver                                            | 2.00        | 1.10-3.66        | 0.024        |
| Heart                                            | 1.38        | 0.51-3.68        | 0.524        |
| Lung                                             | 1.60        | 0.66-3.86        | 0.296        |
| Pancreas                                         | 3.21        | 1.34-7.72        | .009         |
| Study site                                       |             |                  |              |
| Site 1                                           | <i>ref</i>  |                  |              |
| Site 2                                           | 0.55        | 0.31-0.96        | 0.034        |
| Site 3                                           | 0.46        | 0.27-0.79        | 0.004        |

<sup>a</sup>Organism isolated on any clinical culture from any anatomical site in the 12 months prior to the EB BSI. (No surveillance cultures performed at the included study sites.)

<sup>b</sup>Within the 6 months prior to the EB BSI.

<sup>c</sup>Within the 3 months prior to the EB BSI.

aHR, adjusted hazard ratio; aSHR, adjusted subhazard ratio; BSI, bloodstream infection; CI, confidence interval; CRE, carbapenem-resistant Enterobacterales; EB, Enterobacterales; ref, reference.

**Table S6.** Mixed effects multivariable logistic regression analysis of risk factors for death within 60 days of a CRE BSI (N = 70).

| Characteristic                               | aOR        | 95% CI     | P     |
|----------------------------------------------|------------|------------|-------|
| Genitourinary source of CRE BSI              | 0.05       | 0.002-0.93 | 0.045 |
| Prior exposure to a polymyxin <sup>a</sup>   | 6.44       | 1.01-40.93 | 0.049 |
| Pitt bacteremia score (per additional point) | 1.36       | 1.00-1.84  | 0.053 |
| Graft failure prior to the CRE BSI           | 7.66       | 1.16-50.33 | 0.034 |
| Organ transplant type <sup>b</sup>           |            |            |       |
| Kidney                                       | <i>ref</i> |            |       |
| Liver                                        | 0.23       | 0.03-1.85  | 0.165 |
| Heart                                        | 0.43       | 0.02-11.32 | 0.612 |
| Lung                                         | 0.29       | 0.02-4.45  | 0.371 |

**Table S6 Footnote.**

<sup>a</sup>Exposure within the 6 months prior to the EB BSI.

<sup>b</sup>Pancreas transplant recipients were not included in this analysis due to insufficient sample size.

aOR, adjusted odds ratio; BSI, bloodstream infection; CI, confidence interval; CRE, carbapenem-resistant Enterobacterales; ref, reference.

## D. SUPPLEMENTAL FIGURES

**Figure S1.** Kaplan-Meier curve of all-cause mortality following an EB BSI, stratified by resistance to carbapenems and extended-spectrum cephalosporins. BSI, bloodstream infection; CRE, carbapenem-resistant Enterobacterales; EB, Enterobacterales; ESBL, extended-spectrum beta-lactamase.

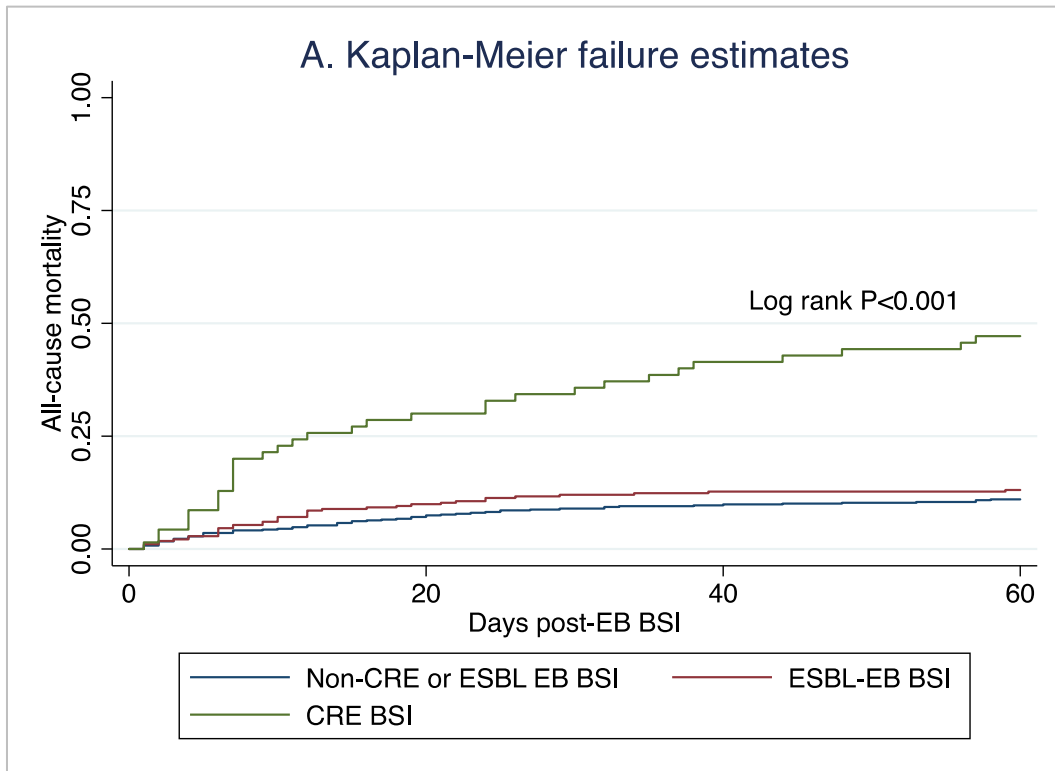

**Figure S2.** Kaplan-Meier curve of all-cause mortality following an EB BSI, stratified by degree of resistance to carbapenems. BSI, bloodstream infection; CRE, carbapenem-resistant Enterobacterales; EB, Enterobacterales.

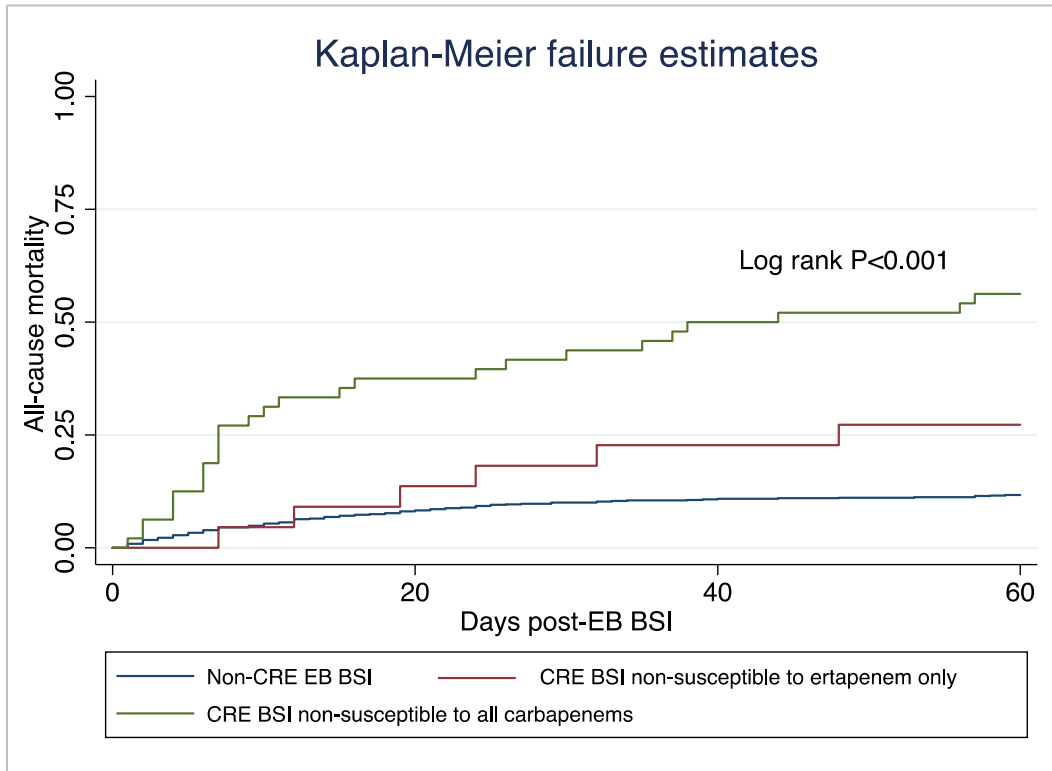

Supplement: NIHMS1835792-supplement-Supplement.pdf [file NIHMS1835792-supplement-Supplement.pdf]
